# Supplementary material for: Excess glucose or fat differentially affects metabolism and appetite-related gene expression during zebrafish embryogenesis
Source: PubMed Central journal article supplement — iScience. 2023 Jun 7;26(7):107063. doi: 10.1016/j.isci.2023.107063 (PMC10391732; doi:10.1016/j.isci.2023.107063), 2023-06-07
Supplement: mmc1.pdf [file mmc1.pdf]

iScience, Volume 26

## **Supplemental information**

**Excess glucose or fat differentially affects  
metabolism and appetite-related gene expression  
during zebrafish embryogenesis**

**Bridget Konadu, Carol K. Cox, Michael R. Garrett, and Yann Gibert**



## Effect of FFA/TAG injection on embryos at 48- and 72-hours post fertilization

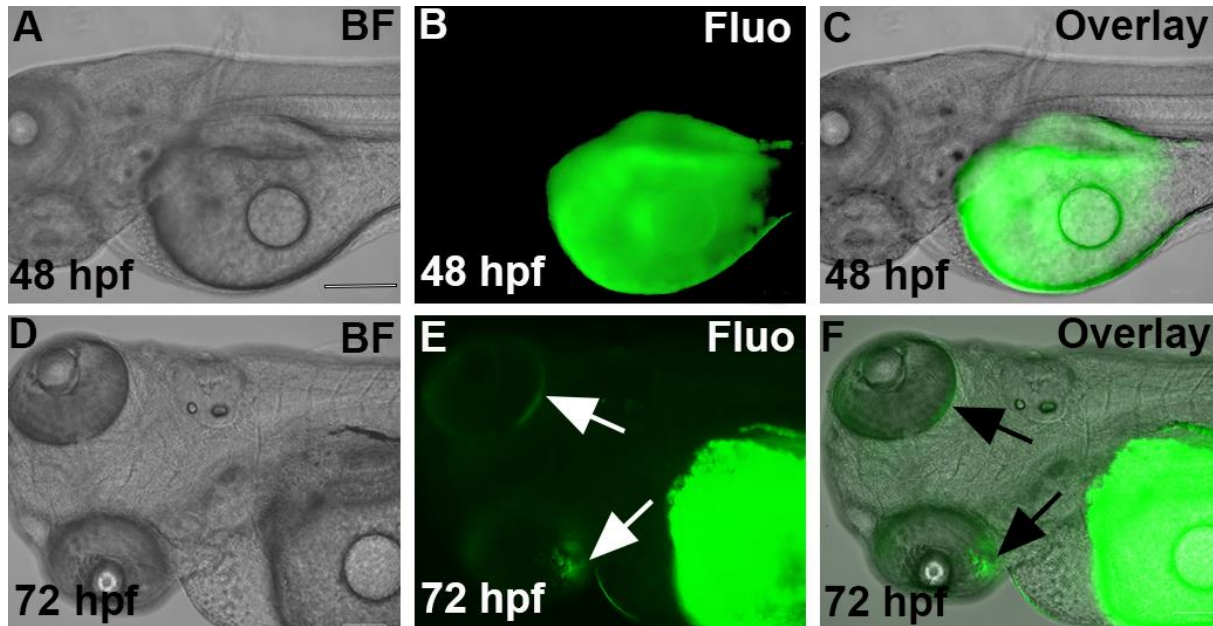

**Supplementary Fig. 2.** Comparison of the effect BODIPY-labeled fluorescent FLC12 FFA/TAG injected on zebrafish embryos at 48 and 72 hpf. A. Brightfield image showing site of injection in a 48 hpf FFA/TAG injected embryo. B. Fluorescent image of the embryo shown in A. C. Merged image of A and B. D. Brightfield image showing site of injection in a 72 hpf FFA/TAG injected embryo. E. Fluorescent image of the embryo shown in D with fluorescence detected in the head (white arrows). F. Merged image of D and E, the black arrows depict fluorescent diffusion in the head. Scale bar: 100  $\mu$ m

# Comparison of upregulated and upregulated DEGs between Glucose treated embryos and FFA/TAG injected embryos

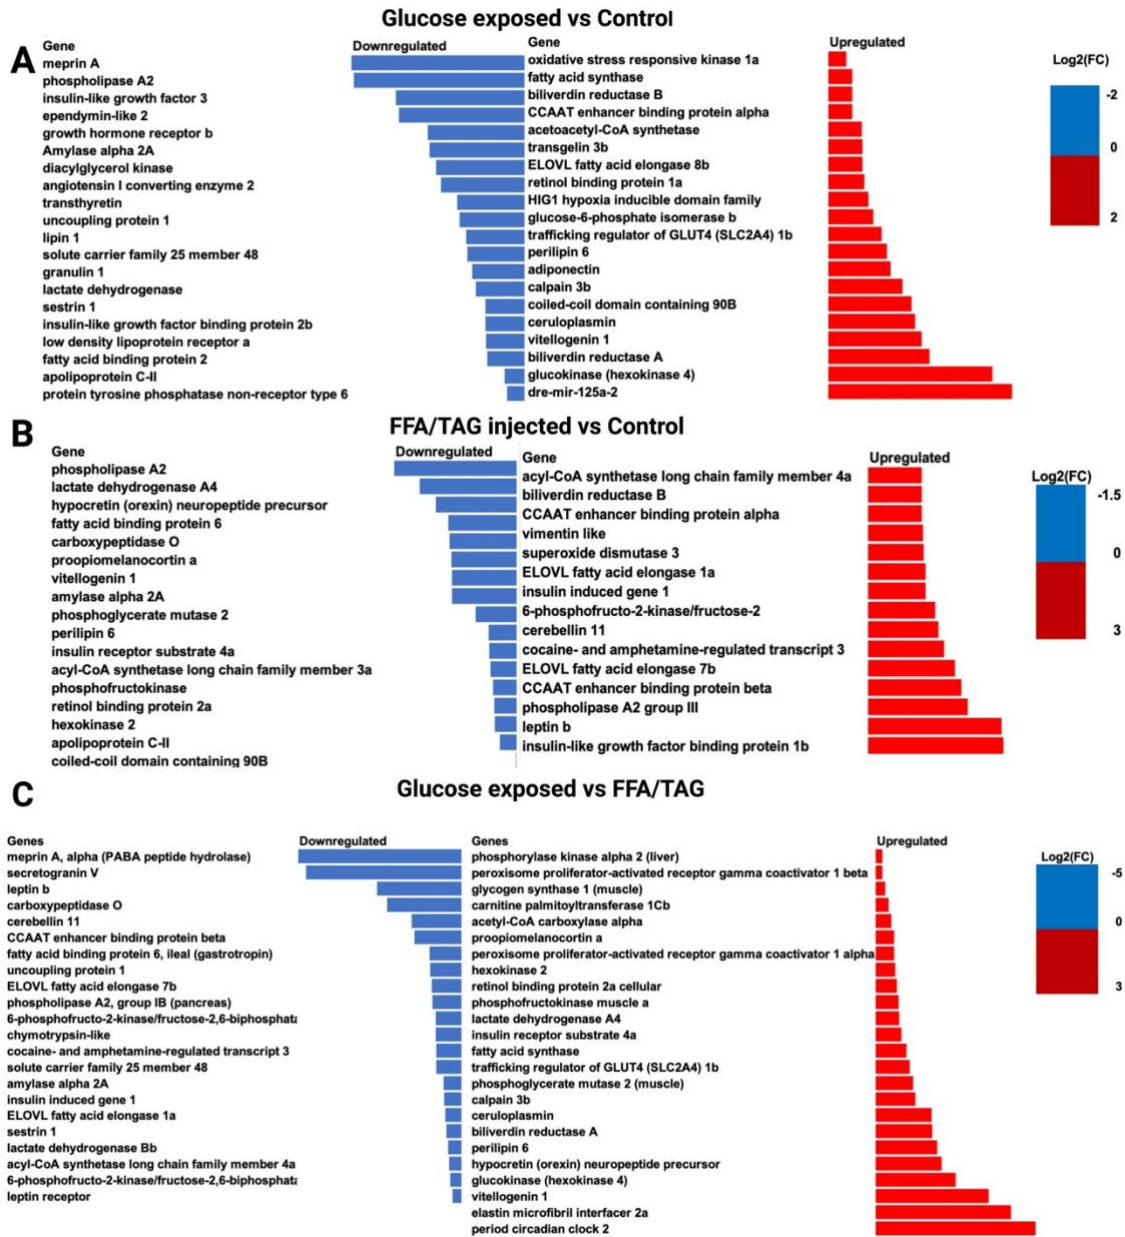

**Supplementary Fig. 3.** Analysis of differentially expressed genes. The first 50 upregulated or downregulated genes represented within a range of (-2 to 2) of log 2 of the fold change were chosen. A. Shows downregulated (blue) and upregulated (red) genes of treatment glucose compared to controls. B. Shows downregulated (blue) and upregulated (red) genes of FFA/TAG injected samples compared to controls. C. FFA/TAG injected samples compared to glucose-exposed samples show significant upregulated genes (blue) and downregulated genes (red).

**Heatmap comparing DEGs in glucose-exposed embryos, FFA/TAG-injected embryos, and controls**

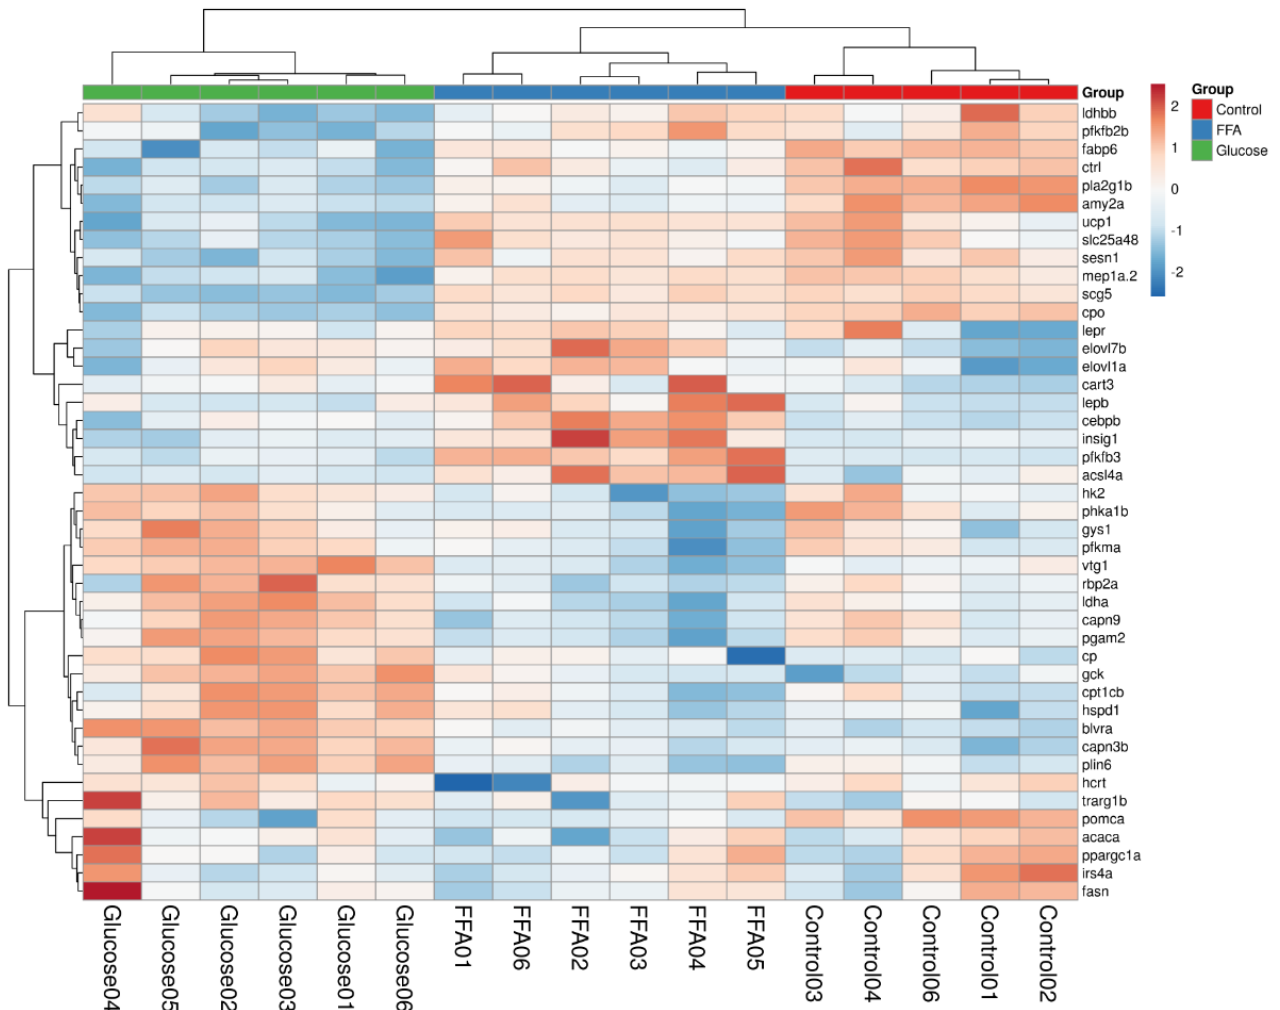

**Supplementary Fig. 4.** Heatmap showing gene intensity per sample relative to the average level across all samples. Individual genes are shown on the Y axis while samples are shown along the X axis. Red and blue cells correspond to higher and lower RNAseq levels, respectively. FFA/TAG injected samples compared to glucose-exposed samples show significantly upregulated genes (blue) and downregulated genes (red).

**Heatmap comparison of Gene ontology terms between glucose exposed embryos, FFA/TAG injected embryos and controls**

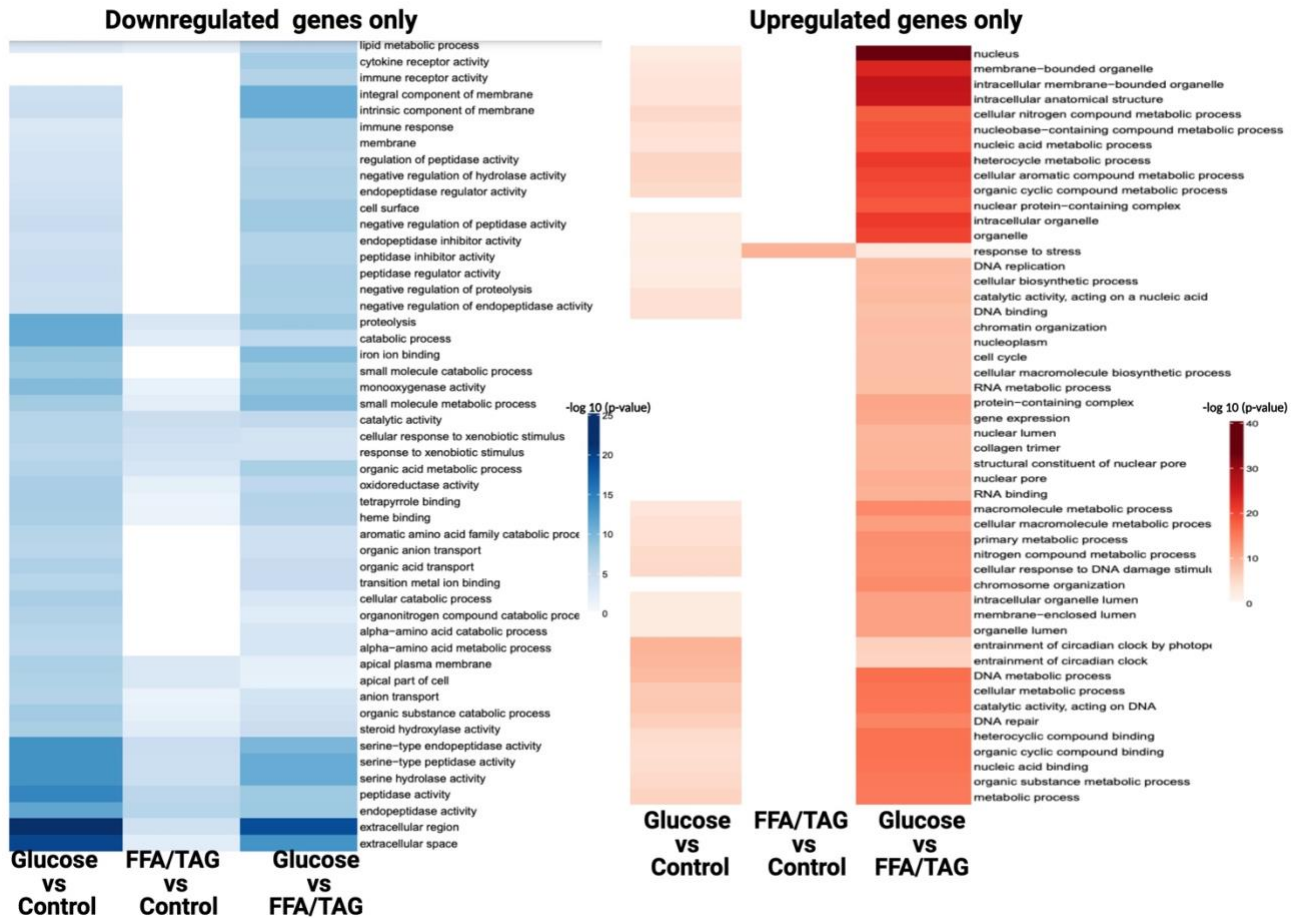

**Supplementary Fig. 5.** Heatmaps of significantly enriched GO terms. Comparisons are shown on the X axis with GO terms on the Y axis between Glucose, FFA/TAG and controls. Enrichment terms were restricted to include only those with 2 or more genes. Only GO terms with an enrichment p-value less than 0.05 and the top 50 terms were included. Results are shown separately for up-regulated and down-regulated genes, Colour (red for enriched among up-regulated genes and blue for those enriched among down-regulated genes) is assigned based on the  $-\log_{10}$  (enrichment p-value), with lighter colours implying less significant enrichment.

Close up view of CB1 transcript by Whole Mount In- situ hybridization

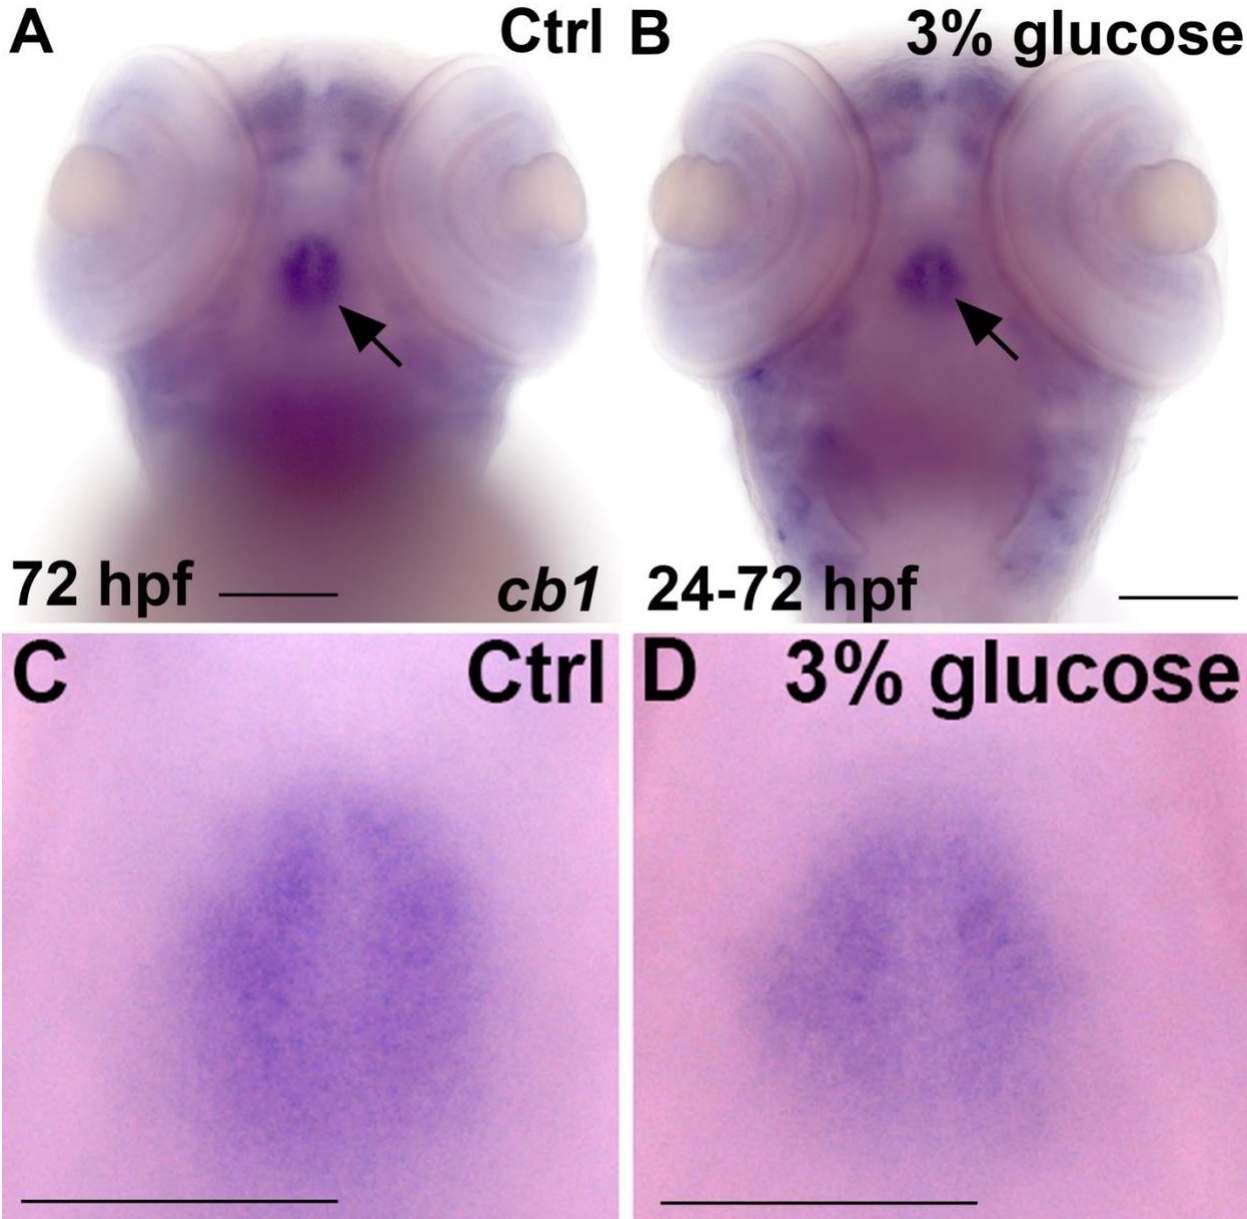

**Supplementary Fig. 6.** Display mRNA expression of CB1 gene (arrows) by WISH in embryos at 72 hpf. A. control B. Glucose-treated embryos (3% w/v). Close-up view of CB1 expression in C. control and D. Glucose. Scale bars 100 μm (A,B); Scale bars 50 μm (C,D).

**Supplementary Table 1.****Table 1. List of primers used for quantitative PCR**

| <b>GENE</b>        | <b>5'FORWARD PRIMER3'</b> | <b>5'REVERSE PRIMER3'</b> |
|--------------------|---------------------------|---------------------------|
| Glut2              | GCAGAAGAACCCTCACTC        | TCTCCGCCACAATAAACC        |
| Insulin            | GGTCCTGTTGGTCGTGTC        | GTTGTAGAAGAAGCCTGTTGG     |
| Insulin receptor a | GATCTGCATCCCTCGTTTCA      | CTCCAGGTCCATGTCAAACCTC    |
| Insulin receptor a | GATCTGCATCCCTCGTTTCA      | CTCCAGGTCCATGTCAAACCTC    |
| Insulin receptor b | AAGGTATGAAAGTGCCGTCC      | GCATTTTCGGTTTTGGGACAG     |
| atgl               | CCTGCAAGGAGTGAGGTATG      | CTGTAGAGGTTGGCGAGTGT      |
| hsla               | CAGGACACCGTAAAGATGCT      | TCCACCAGACAACCTAGACCG     |
| mgll               | CGAGAGGCCGCGAGGATTTTA     | TGAGTTTAGGAGCCAAGCG       |
| Cpt1a              | TCTACCTGAGAGGTCGTGGG      | TAGCCGTTCCCATGAGCAG       |
| Cpt2               | AATGGATTGGGTGCAACGTG      | TGAGTTCTAACCTTCAGGCTC     |
| POMC               | CACTGCTCACACTCTCA         | GCCACCTTCGTTTCTAT         |
| npy                | GCGTTTCTCTTGTTTCGTCTGCTT  | TGACCTTTTCCCATACCTCTGCCT  |
| agrp               | TTGAAGCCTATGATGAGGATCTGG  | CTTAAAGAAGCGGCAGTAGCAGGT  |
| PACAP 1a           | CTGAAGGCGGTGGCAGTAAT      | TTGCAGCCCACAGATCCATAG     |



|              |                         |                         |
|--------------|-------------------------|-------------------------|
| PACAP 1b     | TGCACTCGCAACTACATCCA    | AGCCAACAGAACCAGTGGAG    |
| CART1        | CGAGCAGGACGAGCAGTTCATC  | GCTCCCCTACGTCACACCTG    |
| crh          | TCGTCCATGATCTTGCGGTT    | GAATCTGCACGTGGTTGTCG    |
| Oxytocin     | AAAGGCCTGCGGTTATGAGG    | TTGGCCGGTTGATTGACAGC    |
| Orexin(hcrt) | CTACGAGATGCTGTGCCGAG    | CCAAGAGTGAGAATCCCGAC    |
| CB1          | AGCGGAGCAGGACCAGTTCA    | GGGAACAGCATGGTCAGAGATGC |
| Sf-1         | CATCCTCTTCAACCCCAACG    | GCAGGGCACTTCTCCACACA    |
| pfk (liver)  | GTAACACGCATGGGCATTTTTG  | TCGCCAGTTTGATGTGATCTCCT |
| pfk (muscle) | ATCACATCCGTCCTGCTACATGG | TGGTCTGGAAATCCTTACAGCG  |
| lpl          | CGCAGTTAACAAAATTCGCA    | TCCTTCTCGCCATGTATTCC    |
| cd36         | CTCTGCCTCACTTCCTCT      | GCCGTCTCATTCAACCAT      |
| fabp2        | TCAGCACTTTCGCACACTG     | CTTGGCCTCGACTCCATCAT    |
| Ifabp        | ACGTGGCAGGTTTACGCTCAG   | TTGGAGGTGATGGTGAAGTCG   |

**Supplementary Table 3.****Table 3. Gene table of RNAseq Data (FFA/TAG injected vs Control)**

| Gene ID            | Symbol  | Entrez    | Gene name                                          | Fold change | Log2 (fold change) | P-value   |
|--------------------|---------|-----------|----------------------------------------------------|-------------|--------------------|-----------|
| ENSDARG00000009153 | pla2g1b | 571738    | phospholipase A2, group IB (pancreas)              | -2.743      | -1.456             | 5.37E-08  |
| ENSDARG00000101251 | ldha    | 30496     | lactate dehydrogenase A4                           | -1.153      | -0.205             | 0.00132   |
| ENSDARG00000070932 | hcrtr   | 613239    | hypocretin (orexin) neuropeptide precursor         | -1.943      | -0.959             | 0.0167    |
| ENSDARG00000044566 | fabp6   | 415166    | fatty acid binding protein 6, ileal (gastrotropin) | -1.758      | -0.814             | 0.000428  |
| ENSDARG00000077688 | cpo     | 100005630 | carboxypeptidase O                                 | -1.734      | -0.794             | 0.0000205 |
| ENSDARG00000092233 | vtg1    | 559475    | vitellogenin 1                                     | -1.705      | -0.77              | 0.00054   |
| ENSDARG00000013856 | amy2a   | 406539    | amylase alpha 2A                                   | -1.698      | -0.764             | 0.0000013 |
| ENSDARG00000057571 | pgam2   | 572733    | phosphoglycerate mutase 2 (muscle)                 | -1.399      | -0.485             | 1.31E-07  |
| ENSDARG00000076844 | plin6   | 794783    | perilipin 6                                        | -1.259      | -0.333             | 0.00523   |
| ENSDARG00000086551 | irs4a   | 100329897 | insulin receptor substrate 4a                      | -1.249      | -0.321             | 0.0198    |
| ENSDARG00000032079 | acsl3a  | 567157    | acyl-CoA synthetase long-chain family member 3a    | -1.241      | -0.311             | 0.000142  |
| ENSDARG00000060797 | pfkmb   | 568001    | phosphofructokinase, muscle b                      | -1.225      | -0.293             | 0.00108   |
| ENSDARG00000070038 | rbp2a   | 568032    | Retinol-binding protein 2a, cellular               | -1.205      | -0.269             | 0.00707   |
| ENSDARG00000101482 | hk2     | 406339    | hexokinase 2                                       | -1.195      | -0.257             | 0.00113   |

|                     |         |           |                                                       |        |        |            |
|---------------------|---------|-----------|-------------------------------------------------------|--------|--------|------------|
| ENSDARG00000025375  | idh1    | 100006589 | isocitrate dehydrogenase (NADP (+)) 1                 | -1.183 | -0.242 | 0.0000858  |
| ENSDARG00000092155  | apoc2   | 568972    | apolipoprotein C-II                                   | -1.149 | -0.201 | 0.01       |
| ENSDARG00000044626  | ccdc90b | 100149897 | coiled-coil domain containing 90B                     | -1.008 | -0.011 | 0.09       |
| ENSDARG00000004078  | acsl4a  | 393622    | acyl-CoA synthetase long-chain family member 4a       | 1.281  | 0.357  | 0.0000484  |
| ENSDARG00000096829  | blvrb   | 436959    | biliverdin reductase B                                | 1.283  | 0.359  | 0.000116   |
| ENSDARG00000036074  | cebpa   | 140815    | CCAAT enhancer binding protein alpha                  | 1.287  | 0.364  | 0.000131   |
| ENSDARG00000044501  | viml    | 393746    | vimentin like                                         | 1.313  | 0.393  | 0.00472    |
| ENSDARG00000070168  | sod3a   | 504078    | superoxide dismutase 3, extracellular a               | 1.345  | 0.427  | 0.00196    |
| ENSDARG00000099960  | elov11a | 449816    | ELOVL fatty acid elongase 1a                          | 1.39   | 0.475  | 0.0000234  |
| ENSDARG00000010658  | insig1  | 334189    | insulin induced gene 1                                | 1.396  | 0.481  | 0.000063   |
| ENSDARG00000001953  | pfkfb3  | 554477    | 6-phosphofructo-2-kinase/fructose-2,6-biphosphatase 3 | 1.745  | 0.803  | 4.35E-09   |
| ENSDARG00000086654  | cbln11  | 100149559 | cerebellin 11                                         | 1.899  | 0.925  | 0.00000918 |
| ENSDARG00000035852  | cart3   | 557301    | cocaine- and amphetamine-regulated transcript 3       | 2.161  | 1.112  | 0.000495   |
| ENSDARG000000100185 | elov17b | -         | ELOVL fatty acid elongase 7b                          | 2.768  | 1.469  | 0.0000054  |
| ENSDARG00000042725  | cebpb   | 140814    | CCAAT enhancer binding protein beta                   | 3.221  | 1.688  | 8.47E-07   |

|                    |        |        |                               |       |       |           |
|--------------------|--------|--------|-------------------------------|-------|-------|-----------|
| ENSDARG00000008948 | pla2g3 | 641423 | phospholipase A2<br>group III | 3.768 | 1.914 | 0.000296  |
| ENSDARG00000045548 | lepb   | 564348 | leptin b                      | 8.288 | 3.051 | 0.0000708 |

**Supplementary Table 4.**

**Table 4. Gene table of RNAseq Data (Glucose exposed vs FFA/TAG injected)**

| Gene ID            | Symbol  | Entrez    | Gene name                                                             | Fold<br>change | Log2<br>(fold<br>change) | P-value   |
|--------------------|---------|-----------|-----------------------------------------------------------------------|----------------|--------------------------|-----------|
| ENSDARG00000008029 | mep1a.2 | 565535    | meprin A, alpha<br>(PABA peptide<br>hydrolase), tandem<br>duplicate 2 | -28.929        | -4.854                   | 1.76E-09  |
| ENSDARG00000077045 | scg5    | 393699    | secretogranin V                                                       | -24.464        | -4.613                   | 5.93E-12  |
| ENSDARG00000045548 | lepb    | 564348    | leptin b                                                              | -5.702         | -2.512                   | 0.000722  |
| ENSDARG00000077688 | cpo     | 100005630 | carboxypeptidase O                                                    | -4.643         | -2.215                   | 1.43E-11  |
| ENSDARG00000042725 | cebpb   | 140814    | CCAAT enhancer<br>binding protein beta                                | -2.63          | -1.395                   | 0.0000158 |
| ENSDARG00000044566 | fabp6   | 415166    | fatty acid binding<br>protein 6, ileal<br>(gastrotropin)              | -1.937         | -0.954                   | 0.000131  |
| ENSDARG00000023151 | ucp1    | 83908     | uncoupling protein 1                                                  | -1.905         | -0.929                   | 1.26E-08  |
| ENSDARG00000100185 | elovl7b | -         | ELOVL fatty acid<br>elongase 7b                                       | -1.833         | -0.875                   | 0.00171   |
| ENSDARG00000009153 | pla2g1b | 571738    | phospholipase A2,<br>group IB (pancreas)                              | -1.821         | -0.865                   | 0.0000649 |
| ENSDARG00000001953 | pfkfb3  | 554477    | 6-phosphofructo-2-<br>kinase/fructose-2,6-<br>biphosphatase 3         | -1.698         | -0.764                   | 1.65E-08  |
| ENSDARG00000068680 | ctrl    | 447843    | chymotrypsin-like                                                     | -1.695         | -0.762                   | 5.03E-07  |

|                    |          |        |                                                                       |        |        |            |
|--------------------|----------|--------|-----------------------------------------------------------------------|--------|--------|------------|
| ENSDARG00000035852 | cart3    | 557301 | cocaine- and amphetamine-regulated transcript 3                       | -1.684 | -0.752 | 0.0122     |
| ENSDARG00000021250 | slc25a48 | 436640 | solute carrier family 25 member 48                                    | -1.674 | -0.743 | 1.21E-07   |
| ENSDARG00000013856 | amy2a    | 406539 | amylase alpha 2A                                                      | -1.444 | -0.53  | 0.000154   |
| ENSDARG00000010658 | insig1   | 334189 | insulin induced gene 1                                                | -1.435 | -0.522 | 0.0000412  |
| ENSDARG00000099960 | elov1a   | 449816 | ELOVL fatty acid elongase 1a                                          | -1.399 | -0.484 | 0.00003    |
| ENSDARG00000020693 | sesn1    | 436933 | sestrin 1                                                             | -1.357 | -0.441 | 0.00000931 |
| ENSDARG00000071076 | ldhbb    | 436747 | lactate dehydrogenase Bb                                              | -1.314 | -0.394 | 0.0129     |
| ENSDARG00000004078 | acsl4a   | 393622 | acyl-CoA synthetase long chain family member 4a                       | -1.292 | -0.37  | 0.0000527  |
| ENSDARG00000002037 | pfkfb2b  | 564852 | 6-phosphofructo-2-kinase/fructose-2,6-biphosphatase 2b                | -1.255 | -0.328 | 0.000989   |
| ENSDARG00000070961 | lepr     | 567241 | leptin receptor                                                       | -1.204 | -0.268 | 0.000455   |
| ENSDARG00000037943 | cpt1cb   | 550361 | carnitine palmitoyltransferase 1Cb                                    | 1.156  | 0.209  | 0.00674    |
| ENSDARG00000105039 | phka1b   | 562402 | phosphorylase kinase, alpha 1b (muscle)                               | 1.382  | 0.467  | 0.000826   |
| ENSDARG00000067829 | ppargc1a | 553418 | peroxisome proliferator-activated receptor gamma, coactivator 1 alpha | 1.232  | 0.301  | 0.0134     |
| ENSDARG00000016875 | gys1     | 394155 | glycogen synthase 1 (muscle)                                          | 1.115  | 0.157  | 0.0394     |

|                    |         |           |                                            |       |       |          |
|--------------------|---------|-----------|--------------------------------------------|-------|-------|----------|
| ENSDARG00000056160 | hspd1   | 282676    | heat shock 60 protein 1                    | 1.139 | 0.188 | 0.00493  |
| ENSDARG00000078512 | acaca   | 559403    | acetyl-CoA carboxylase alpha               | 1.195 | 0.257 | 0.00179  |
| ENSDARG00000043135 | pomca   | 353221    | proopiomelanocortin a                      | 1.23  | 0.298 | 0.035    |
| ENSDARG00000101482 | hk2     | 406339    | hexokinase 2                               | 1.245 | 0.316 | 0.000241 |
| ENSDARG00000070038 | rbp2a   | 568032    | retinol binding protein 2a, cellular       | 1.268 | 0.342 | 0.00166  |
| ENSDARG00000014179 | pfkma   | 447836    | phosphofructokinase, muscle a              | 1.296 | 0.374 | 0.000509 |
| ENSDARG00000101251 | ldha    | 30496     | lactate dehydrogenase A4                   | 1.306 | 0.385 | 2.46E-06 |
| ENSDARG00000086551 | irs4a   | 100329897 | insulin receptor substrate 4a              | 1.337 | 0.419 | 0.00479  |
| ENSDARG00000087657 | fasn    | 559001    | fatty acid synthase                        | 1.412 | 0.498 | 2.90E-05 |
| ENSDARG00000094675 | trarg1b | 556978    | trafficking regulator of GLUT4 (SLC2A4) 1b | 1.469 | 0.555 | 0.000676 |
| ENSDARG00000012341 | capn9   | 445107    | calpain 9                                  | 1.503 | 0.588 | 5.01E-07 |
| ENSDARG00000057571 | pgam2   | 572733    | phosphoglycerate mutase 2 (muscle)         | 1.522 | 0.606 | 9.47E-09 |
| ENSDARG00000043035 | capn3b  | 100034405 | calpain 3b                                 | 1.565 | 0.646 | 1.80E-08 |
| ENSDARG00000010312 | cp      | 84702     | ceruloplasmin                              | 1.878 | 0.909 | 0.00318  |
| ENSDARG00000059857 | blvra   | 767661    | biliverdin reductase A                     | 1.891 | 0.919 | 2.78E-07 |
| ENSDARG00000076844 | plin6   | 794783    | perilipin 6                                | 2.001 | 1.001 | 4.32E-08 |
| ENSDARG00000070932 | hert    | 613239    | hypocretin (orexin) neuropeptide precursor | 2.109 | 1.077 | 0.0108   |
| ENSDARG00000068006 | gck     | 751668    | glucokinase (hexokinase 4)                 | 2.467 | 1.303 | 0.000375 |
| ENSDARG00000092233 | vtg1    | 559475    | vitellogenin 1                             | 3.57  | 1.836 | 2.03E-08 |
